1 **Survival and detection of bivalve transmissible neoplasia from the soft-shell clam *Mya arenaria***  
2 **(MarBTN) in seawater**

3

4 Rachael M. Giersch<sup>1</sup>, Samuel F.M. Hart<sup>1,2</sup>, Satyatejas G. Reddy<sup>3,4</sup>, Marisa A. Yonemitsu<sup>1,2</sup>, María J.  
5 Orellana Rosales<sup>3,5</sup>, Madelyn Korn<sup>1,6</sup>, Brook M. Geleta<sup>1,7</sup>, Peter D. Countway<sup>3</sup>, José A. Fernández  
6 Robledo<sup>3</sup>, Michael J. Metzger<sup>1,2\*</sup>

7

8 **AUTHOR INFORMATION**

9 1 Pacific Northwest Research Institute, Seattle, WA 98122, USA

10 2 Molecular and Cellular Biology Program, University of Washington, Seattle, WA 98195, USA

11 3 Bigelow Laboratory for Ocean Sciences, East Boothbay, ME 04544, USA

12 4 University of Georgia, Athens, GA 30602, USA

13 5 Southern Maine Community College, South Portland, ME 04106, USA

14 6 Tulane University, New Orleans, LA 70118, USA

15 7 Macalester College, Saint Paul, MN 55105, USA

16 \* Corresponding author: [metzgerm@pnri.org](mailto:metzgerm@pnri.org)

17

18 **ABSTRACT**

19 Many pathogens can cause cancer, but cancer itself does not normally act as an infectious agent.

20 However, transmissible cancers have been found in a few cases in nature: in Tasmanian devils, dogs, and

21 several bivalve species. The transmissible cancers in dogs and devils are known to spread through direct

22 physical contact, but the exact route of transmission of bivalve transmissible neoplasia (BTN) has not yet  
23 been confirmed. It has been hypothesized that cancer cells could be released by diseased animals and  
24 spread through the water column to infect/engraft into other animals. To test the feasibility of this  
25 proposed mechanism of transmission, we tested the ability of BTN cells from the soft-shell clam (*Mya*  
26 *arenaria* BTN, or MarBTN) to survive in artificial seawater. We found that BTN cells are highly sensitive  
27 to salinity, with acute toxicity at salinity levels lower than those found in their environment. BTN cells  
28 also survive longer at lower temperatures, with >48% of cells surviving a week in seawater at  
29 temperatures from 4°C to 16°C, and 49% surviving for more than two weeks at 4°C. With one clam  
30 donor, living cells were observed for more than eight weeks at 4°C. We also used qPCR of environmental  
31 DNA (eDNA) to detect the presence of BTN-specific DNA in the environment. We observed release of  
32 BTN-specific DNA into the water of aquaria from tanks with highly BTN-positive clams, and we detected  
33 BTN-specific DNA in seawater samples collected from BTN-endemic areas, although the level detected  
34 was much lower. Overall, these data show that BTN cells can survive well in seawater, and they are  
35 released into the water by diseased animals, supporting the hypothesis that BTN is spread from animal-to-  
36 animal by cells through seawater.

37

## 38 **KEYWORDS**

39 transmissible cancer, contagious cancer, bivalve transmissible neoplasia, BTN, MarBTN, soft-shell clam,  
40 *Mya arenaria*, disseminated neoplasia

41

## 42 **INTRODUCTION**

43 Most cancer stays with the organism from which it came, arising and dying within a single host,  
44 but in a few cases, cancer has evolved to transmit from one animal to the next, acting as a pathogen as  
45 well as a cancer. The first naturally transmissible cancers to be found were the canine transmissible

46 venereal tumor (CTVT) (1, 2) and the Tasmanian devil facial tumor disease (DFTD) (3, 4). More  
47 recently, a leukemia-like disease in multiple bivalve species, called disseminated neoplasia (DN) or hemic  
48 neoplasia, was shown to be a transmissible cancer (5). DN is characterized by proliferation of non-  
49 adherent, rounded, polyploid neoplastic cells primarily found in the hemolymph of infected bivalves,  
50 which disseminate into tissues during later stages of this typically fatal disease (6, 7). The disease had  
51 been reported for many decades, although the etiology was unknown. Retroviruses or pollution had been  
52 thought to be the likely causes (8, 9), although two early reports had suggested that it could be due to  
53 infectious spread of cancer cells (Sunila et al. 1998 and James Moore's 1993 Ph.D. Dissertation (10, 11)).  
54 DN was first confirmed to be a transmissible cancer in soft-shell clams (*Mya arenaria*) (5), and later,  
55 multiple independent lineages of transmissible cancer were identified in multiple species worldwide (12).  
56 To date, seven lineages of the bivalve transmissible neoplasia (BTN) in eight bivalve species have been  
57 reported (5, 12-17). In many cases, the BTN that circulates in each species has arisen from a member of  
58 that same species. However, increasing cases of cross-species transmission have been reported (a lineage  
59 from *Venerupis corrugata* to *Polititapes aureus* and a single lineage of *Mytilus* BTN now found in four  
60 *Mytilus* species). Furthermore, multiple independent lineages of BTN have been found to circulate within  
61 the same species (as in *Cerastoderma edule* and *Mytilus trossulus*). In soft-shell clams, all analyzed  
62 samples of DN since the confirmation of cancer transmission so far have proven to be a part of one  
63 lineage of BTN that arose from a single founder soft-shell clam and has since spread throughout  
64 populations along the North American East Coast between Prince Edward Island (Canada) and New York  
65 (USA). DN has been reported in *M. arenaria* as early as 1978 (18, 19) and it has been observed as far  
66 south as Chesapeake Bay, Maryland, USA (9, 20, 21). While it is likely that these earlier reports of DN in  
67 soft-shell clams represent the same BTN lineage observed today, this cannot yet be confirmed.

68           CTVT and DFTD are well known to be transmitted by close physical contact (during sex and  
69 biting, respectively), but most adult bivalves are sessile or with limited mobility, without direct contact of  
70 soft body tissues, making widespread BTN transmission through direct contact unlikely. The genomic

71 evidence clearly shows that cancers in different individual bivalves do not match the genotypes of their  
72 hosts and that cancers in different individuals, separated by large distances (and in some cases in different  
73 species and different oceans), are nearly identical, so the cancer lineages must transmit through some  
74 alternate mechanism. The most likely route of transmission is release of the BTN cells into the seawater  
75 and uptake of the cells by naïve animals through filter feeding. For this to occur, BTN cells need to be  
76 released from animals and survive in seawater long enough to engraft into a naïve individual.

77         A previous report (the first known to propose a transmissible cancer hypothesis for DN in  
78 bivalves) characterized the survival of cancer cells from soft-shell clams collected from Chesapeake Bay  
79 in 1989 and showed that they survive well for 6 hours, and that survival can be affected by salinity and  
80 temperature (10). As in Sunila et al., we aim to analyze the ability of BTN cells from soft-shell clams  
81 (*Mya arenaria* BTN, or MarBTN) to survive in seawater. We determined the effect of salinity, pH, and  
82 temperature on their short-term survival in artificial seawater (ASW), and we determined how long the  
83 cells can survive at varying temperatures. We additionally tested whether BTN cells can be detected in  
84 seawater through the analysis of environmental DNA (eDNA) collected from both laboratory and field  
85 settings. Our findings provide further validation supporting seawater-based transmission of BTN in the  
86 wild.

87

## 88 **MATERIALS AND METHODS**

### 89 **Collection of clams and MarBTN cells**

90 Soft-shell clams (*M. arenaria*) were collected by commercial sources from multiple locations in Maine,  
91 USA (Table S1), and animals were screened for high levels of DN as before (5). Animals were housed in  
92 1× ASW (36 g / L Instant Ocean, Blacksburg, VA, USA), in aerated aquaria, supplemented 2-3 times  
93 weekly with PhytoFeast or LPB Frozen Shellfish Diet (Reed Mariculture, Campbell, CA, USA).  
94 Approximately 0.5-1 mL of hemolymph was collected from the pericardial sinus of each animal using a

95 0.5 in 26-gauge needle on a 3 mL syringe. Several drops were placed in a well of a 96-well plate and  
96 incubated at 4-10°C for 1 hour to allow the cells to settle. Wells were screened for clams with high levels  
97 of BTN based on morphological differences between healthy hemocytes and BTN cells on an inverted  
98 phase-contrast microscope. Only animals with  $\geq 75\%$  of cancer cells in their hemolymph were used in  
99 survival experiments.

#### 100 **Counting live cells in artificial seawater**

101 We used the alternate vital dye, erythrosine B (MilliporeSigma, Burlington, MA, USA) to stain samples  
102 to discriminate live and dead cells during counting. This dye is soluble throughout all salinities used in  
103 this study. To count live cells, 10  $\mu\text{L}$  of ASW containing cells were mixed 1:1 with 2 $\times$  erythrosine B  
104 solution (10  $\mu\text{g}/\text{mL}$ , dissolved in PBS4, which is PBS plus 400 mM NaCl to approximate marine  
105 salinity). After 10 min at room temperature, live cells were counted manually on a hemocytometer,  
106 counting only rounded, refractive cells that exclude dye.

#### 107 **Short-term cell survival assays**

108 For short-term MarBTN cell survival assays, hemolymph was collected from heavily neoplastic animals,  
109 and allowed to sit on a 6 cm tissue culture dish or 24-well plate at 4 °C for one hour to allow any healthy  
110 hemocytes to adhere to the dish so that they could be removed. Non-adherent cells were then removed  
111 and spun down at 500  $\times$  g for 10 min at 4 °C. Hemolymph was removed, and cells were resuspended in  
112 1 $\times$  ASW: filter-sterilized Instant Ocean with no additives, 36 g/L, specific gravity (sg) 1.023, and pH  
113 7.93. For salinity, cells were diluted to an approximate concentration of  $1 \times 10^6$  cells/mL, and 20  $\mu\text{L}$  of  
114 cells were added to 180  $\mu\text{L}$  of ASW with varying concentrations of Instant Ocean, from 0 to 2 $\times$  the  
115 normal salinity level (with sg measured by a refractometer) and placed in wells of a 96-well plate at 16°C.  
116 Cell counts at 4 hours were normalized to expected concentration calculated pre-dilution, as cell death in  
117 low salt was too rapid to allow for counting after dilution. For pH, cells were aliquoted into one tube for  
118 each condition, spun a second time, and resuspended in 200  $\mu\text{L}$  of ASW with different pH (3.8-9.3,

119 modified with 2M NaOH or 3N HCl), with a target of  $1 \times 10^6$  cell/mL, and put into wells of a 96-well  
120 plate. For temperature, the cells were resuspended in 400  $\mu$ L of 1 $\times$  ASW (sg 1.023, pH 7.93) and placed  
121 in wells of a 24-well plate at the indicated temperatures (4-37°C). For pH and temperature, cell counts at  
122 time zero were used to normalize cell survival.

### 123 **Long-term cell survival assays**

124 For long-term cell survival, penicillin/streptomycin (1 $\times$ , GenClone, Genesee Scientific, El Cahan, CA,  
125 USA) and voriconazole (1 mM final concentration, Acros Organics, Thermo Fisher Scientific, Waltham,  
126 MA, USA) was added to ASW. Other antimicrobial drugs were tested (e.g., moxifloxacin, doxycycline,  
127 metronidazole, and triclosan) but were not found to reduce contaminants at a concentration that was non-  
128 toxic to BTN cells. Cells were collected as above and resuspended in 400  $\mu$ L 1 $\times$  ASW with  
129 penicillin/streptomycin/voriconazole, in wells of a 48-well plate, at  $2 \times 10^5 - 2 \times 10^6$  cells/mL. After each  
130 timepoint, the volume was measured by pipette, and ASW with antimicrobial drugs was added to replace  
131 the media removed for cell counting and lost due to evaporation. Live cell counts at each timepoint were  
132 normalized by live cell counts at time zero to calculate survival, and the normalization value was  
133 multiplied by 0.975 after each additional timepoint to reflect the removal of 10  $\mu$ L of cells from the  
134 original 400  $\mu$ L sample.

### 135 **eDNA extraction from aquaria**

136 Animals were maintained at approximately 10°C in individual tanks in 1 L of 1 $\times$  ASW, with constant  
137 aeration. 24 hrs prior to water collection, the entire volume of the tank water was replaced. Each day for  
138 three days, 250 mL of each water sample was collected, and the entire tank water was replaced, so that  
139 each sampling is from water with 24 hrs of exposure to a single clam. Water samples were vacuum  
140 filtered through a 47 mm 0.45  $\mu$ m cellulose nitrate filter. Using forceps, the filtered sample/paper was  
141 folded small enough to fit into a 2 mL tube and frozen at -80°C until extraction was performed.

142 Extraction protocol was modified from Renshaw et al. (22). Briefly, 900  $\mu$ L CTAB buffer (2% CTAB  
143 w/v, 20 mM EDTA, 100 mM Tris-HCl, and 1.4 M NaCl, in water) was added to the filter, and the tubes  
144 were incubated at 65°C for 30 min. Tubes were spun to collect the sample in the bottom of the tube and  
145 900  $\mu$ L chloroform:isoamyl alcohol (24:1) was added, followed by shaking or vortexing. Tubes were  
146 spun for 5 min at 15,000  $\times$  g, and the 700-850  $\mu$ L aqueous layer was transferred to a new tube with 700  
147  $\mu$ L chloroform. This was shaken and spun as before and the  $\sim$ 700  $\mu$ L aqueous layer was transferred to a  
148 new tube with 700  $\mu$ L cold isopropanol and 24  $\mu$ L 5M NaCl. 4.67  $\mu$ L glycogen blue was added to ensure  
149 visibility of the pellet, and samples were allowed to precipitate overnight at -20 to -30°C. DNA was spun  
150 for 10 min at 15,000  $\times$  g and the liquid removed by pipette. 500  $\mu$ L of 75% ethanol was slowly added and  
151 poured off. DNA pellets were air dried and resuspended in 100  $\mu$ L Buffer EB (Qiagen, Hilden, Germany).

#### 152 **Seawater collection and extraction of MarBTN eDNA**

153 Seawater samples were collected from surface water overlying clam-flats in Maine by filling a single 4-  
154 liter acid-washed (5% HCl) HDPE bottle from each location (Quahog Bay Dam, June 6, 2021,  
155 43.812541, -69.896802; Gurnet Landing, June 6, 2021, 43.853734, -69.898677; and Long Cove, June 13,  
156 2021, 43.777156, -69.958582). Sample bottles were stored in a cooler with ice packs until delivery to  
157 Bigelow Laboratory within 24 hours of collection. Triplicate sub-samples of 500 mL seawater were  
158 filtered from each bottle onto 47 mm diameter, 0.2  $\mu$ m Supor filters (Pall Corp., Ann Arbor, MI, USA) to  
159 collect environmental DNA. Filters were rolled and placed in 4.5 mL cryovials (USA Scientific, Ocala,  
160 FL, USA) for storage at -80°C until DNA extraction. Filters were rolled to ensure that the particle-bearing  
161 filter surface faced inward and that the filter would unfurl when it was transferred to a DNA extraction  
162 tube.

163 Environmental DNA was extracted from the Supor filters using the DNeasy PowerWater kit (Qiagen).  
164 Frozen filters were transferred from the cryovials to the 5 mL PowerWater bead tubes and 1 mL of  
165 warmed (55°C) PW1 solution was added. Bead tubes containing a filter, PW1 solution and garnet beads  
166 were vortexed for 30 min on a Vortex Genie IIT (Scientific Industries, Bohemia, NY, USA) using a 15

167 mL tube adapter. After the bead-beating step, the crude cell lysate, extracted Supor filter, and most of the  
168 beads were tapped into the barrel of a sterile 10 mL syringe held over a 2 mL Eppendorf DNA LoBind  
169 tube to catch sample lysate. The syringe's plunger was inserted a short way into the syringe barrel before  
170 the syringe assembly was flipped upright to purge air. The syringe assembly was inverted over the 2 mL  
171 LoBind tube for a second time, and the remaining lysate was pressed out of the bead and filter slurry. The  
172 volume of this crude sample lysate was recorded, and the remainder of the DNA extraction procedure  
173 followed the kit protocol. Extracted DNA samples were stored in DNA LoBind tubes at -20°C until  
174 analysis by qPCR.

### 175 **qPCR of hemocyte DNA and eDNA**

176 To quantify the presence of neoplastic DNA in a hemolymph genomic DNA or eDNA sample, allele-  
177 specific qPCR was performed using four sets of primers (Table S2). The primary locus was a MarBTN-  
178 specific insertion of the LTR-retrotransposon *Steamer* at the *NIN2* gene. A MarBTN-specific primer pair  
179 targeting this insertion junction amplifies ½ the total amount of *NIN1* alleles in a cancer cell (as the  
180 insertion is in two of four copies of the gene in a tetraploid region) and a primer pair in a conserved  
181 region of the *NIN2* ORF nearby quantifies the total copies of the *NIN2* locus present. The ratio of the two  
182 can be used to determine the fraction of clam hemolymph made up of MarBTN cells. A single plasmid  
183 (pCR-*Steamer*LTR-N1N2) was used for the standard curve. It was made by cloning the *Steamer*-N1N2  
184 amplicon, amplified from genomic DNA of MarBTN cells (Zero Blunt TOPO PCR cloning kit,  
185 Invitrogen, Waltham, MA). The secondary marker was a different MarBTN-specific *Steamer* integration  
186 site, termed HL03 (23). A plasmid was cloned which includes both the HL03 locus and a separate  
187 conserved region of the *EF1α* gene as a control (pIMHL03c2-EF1α). Primers used for cloning control  
188 plasmids are listed in Table S2, and sequences have been submitted to GenBank. The plasmid  
189 concentration was measured (Qubit, Thermo Fisher Scientific) and copy number per μL was calculated  
190 based on the plasmid sizes. Plasmids were linearized with 0.25 μL of NotI-HF (NEB, Ipswich, MA,  
191 USA) for 30 min at 37°C in a 20 μL reaction at  $1 \times 10^{10}$  copies/μL, heat-inactivated 20 min at 65°C, then



192 diluted to  $1 \times 10^9$  with 180  $\mu$ L Buffer AE (Qiagen). Standard curves were prepared from  $1 \times 10^7$   
193 copies/rxn to  $1 \times 10^1$  copies/rxn. For aquaria samples, 2  $\mu$ L of extracted eDNA was run in 10  $\mu$ L  
194 reactions on a StepOnePlus real-time PCR cyclers (Applied Biosystems, Waltham, MA, USA). For field  
195 eDNA samples, 4  $\mu$ L of eDNA was used in a 20  $\mu$ L reaction for increased sensitivity. Reactions were run  
196 as follows: 95°C for 2 min, 40 cycles of 95°C for 15 s and 60°C for 30 s, followed by a melt curve using  
197 95°C for 15 s, 60°C for 1 min, and ramping 0.3°C from 60°C to 95°C, followed by a 15 s hold at 95°C.  
198 All samples were run in triplicate and values presented are an average of triplicates, treating wells with  
199 undetectable amplification as zero copies.

200

## 201 RESULTS

202 In order to determine the factors that affect survival of *M. arenaria* BTN cells in seawater, we collected  
203 MarBTN cells from heavily neoplastic animals and incubated those cells in ASW of varying salinity, pH,  
204 and temperature. Identification of dead cells is challenging in marine cells, as trypan blue (a vital  
205 exclusion dye often used to identify dead cells in mammalian cell culture) precipitates out of solution  
206 when prepared at salinities found in seawater. Therefore, we tested alternate vital dyes, and found that  
207 erythrosine B remains in solution and functions well at salinities up at least twice marine salinity (72 g/L  
208 Instant Ocean, 1.045 sg).

209 As found in the previous study of bivalve DN cells, MarBTN cells rapidly die in low salinity water  
210 (Figure 1A). In contrast, the majority of cells survive at least 4 hrs in ASW of expected marine salinity in  
211 the New England area (1.023 sg). BTN cells also show the greatest survival at expected marine pH, but  
212 complete cell death required highly acidic conditions not likely to be relevant to the environment (Figure  
213 1B). Variation of temperature from 4 to 37°C, in contrast, had minimal effect on survival within 4 hours  
214 (Figure 1C).

215 A four-hour incubation was chosen for these experiments as we found that proliferation of bacteria,  
216 protists, and unknown ciliates led to inconsistent cell survival in ASW beyond short-term incubation  
217 (consistent with Sunila et al). We recently found, however, that with the use of penicillin/streptomycin  
218 and notably, the addition of voriconazole, contaminant overgrowth could be controlled. We were  
219 therefore able to follow MarBTN cell survival long-term. We found that cells were able to survive far  
220 longer than four hours in  $1\times$  ASW, approximating typical marine conditions (Figure 2). We observed  
221 some variability in survival times for cells from different donor animals, but overall, we found that cells  
222 consistently survived longer at colder temperatures. At temperatures from  $4^{\circ}\text{C}$  to  $16^{\circ}\text{C}$ , an average of  
223  $>48\%$  of BTN cells survived for one week, and, at  $4^{\circ}\text{C}$ ,  $49\%$  of cells survived for two weeks. For cells  
224 from one animal,  $>50\%$  of BTN cells were still alive after one month at  $4^{\circ}\text{C}$  (living cells could still be  
225 detected after more than 8 weeks). This dramatically increases the amount of time BTN cells are known  
226 to survive in ASW, showing that BTN cells survive long enough to broadly disseminate through seawater  
227 to infect other clams.

228 For BTN to be spread through the water, cells need to survive, but they also need to get into the water  
229 from a diseased animal. To test whether BTN cells are released by diseased clams, we used qPCR of  
230 eDNA collected from both aquaria and natural water columns in regions with endemic BTN to look for  
231 two markers found only in *M. arenaria* BTN cells. Both cancer-specific primer pairs amplify specific  
232 integration sites of the LTR-retrotransposon *Steamer*, found only in BTN cells (*Steamer* is highly  
233 amplified within *M. arenaria* BTN cells, (23)). The cancer-HL03 primers amplify an insertion site cloned  
234 previously (23), and the cancer-*NIN2* primers amplify an insertion found near an ORF with high  
235 similarity to the gene *NIN2* (identified through preliminary analysis of MarBTN genome sequencing). As  
236 a control, primers in the conserved ORF of *NIN2* are used to amplify total copies of the *NIN2* locus. Both  
237 alleles in healthy cells amplify only with the healthy *NIN2* primers, while MarBTN cells contain both the  
238 normal and the cancer-associated alleles and amplify with both primers (Figure 3A-C).

239 To test whether BTN-specific DNA can be released and subsequently detected in seawater, we housed  
240 one healthy and two highly neoplastic animals in separate, individual aquaria, changed the water, and then  
241 after 24 hrs collected a water sample for eDNA extraction. This was done for 3 consecutive days for each  
242 animal (Figure 3D-E). The qPCR data confirm that the healthy animal releases some normal DNA and no  
243 detectable BTN-specific DNA, while the heavily diseased animals release significant amounts of cancer-  
244 specific DNA across all three days, although the amount does vary from one 24-hour period to the next.  
245 This pattern is confirmed using the secondary HL03 cancer-specific primer set (Figure S1). Additionally,  
246 we can see that the ratio of cancer-*NIN2* to total-*NIN2* is between 0.4-0.5, suggesting that the majority of  
247 DNA in the water from both diseased animals came from released BTN cells (the cancer cells contain  
248 both an allele with the insertion and one without, so pure BTN cells have a 0.5 cancer-allele fraction).  
249 The natural clam environment is far larger than a 1 L tank, so we next wished to test whether MarBTN-  
250 specific DNA could be found in wild environments where clam populations are known to be affected by  
251 endemic BTN. We chose three populations in Maine, collected surface water samples from each site,  
252 extracted eDNA, and performed qPCR (Figure 3F). Due to the potential for contamination with the  
253 control plasmid, only the HL03 marker was used for analysis of field samples, as this plasmid was not  
254 present in the lab where eDNA was extracted. These results showed levels far lower than aquaria levels  
255 with known heavily diseased animals, as expected, but we did observe MarBTN-specific amplification in  
256 two of the three sub-samples from Long Cove at a level above 1 copy/reaction (with amplification  
257 observed in all triplicate reactions for those two eDNA subsamples). This shows that BTN-specific DNA  
258 can be found in field samples of seawater in addition to being found in more concentrated laboratory  
259 conditions, again providing evidence for the hypothesized seawater-transmission of BTN.

## 260 **DISCUSSION**

261 This study has shown that MarBTN cells can survive for many weeks in seawater under the right  
262 conditions, that they are acutely impacted by salinity but not pH, and that they can survive longer at  
263 colder environmental temperatures. We also show that eDNA from MarBTN cells can be detected in both

264 aquaria and field samples, providing evidence for release of BTN cells from diseased animals for the first  
265 time. The previously proposed mechanism of transmission of BTN through seawater requires both long-  
266 term cell survival in the environment and release of BTN cells into the environment by diseased animals.  
267 This study provides evidence supporting both of those requirements.

268 This study largely agrees with the findings of Sunila et al. (10), showing the strong effect of salinity, but  
269 minimal effect of pH, and minimal effect of temperature on short-term survival except for toxicity at high  
270 temperatures. However, the cancer cells in the previous study demonstrated optimal survival in 10-15 ppt  
271 (approximately 1.0075-1.011 sg), a salinity level that was highly toxic to the cells in this study. Notably,  
272 the samples from that study were collected from northern Chesapeake Bay. In this estuary environment  
273 the surface seawater was 10 ppt, whereas the samples in the current study were taken from the coast of  
274 Maine, where the seawater has a much higher salinity. Sunila et al. had hypothesized an infectious cause  
275 for BTN, but it had not been confirmed at the time of that study, so it is unclear whether the cancer cells  
276 in that study were from the same lineage that is currently affecting New England and Prince Edward  
277 Island clams. The differences between these two findings strongly suggests that there has been evolution  
278 of BTN to survive in the seawater in which it must survive in order to transmit. This could represent  
279 evolution of two separate lineages within different environmental conditions, or it could represent  
280 divergence of a single lineage to better survive in marine vs. estuarine environments. Regardless, both  
281 studies showed that cancer cells were acutely sensitive to salinities lower than 10 ppt (1.0075 sg). To date,  
282 no DN has been observed in freshwater environments, so low-salinity environments may provide a  
283 potential “safe harbor” for bivalves, where transmissible cancer cannot survive.

284 We found clear evidence that BTN cells survive longer in the environment in colder temperatures, which  
285 may have implications for understanding the seasonality of BTN. BTN in soft-shell clams and other  
286 species have been reported to have seasonal fluctuations in prevalence (20, 24, 25), and these results  
287 suggest that transmission may be more likely in colder seasons, although there are additional unknown  
288 factors, such as the effect of temperature on the progression of disease.

289 A very recent study of the MtrBTN2 lineage of transmissible cancer, known to infect four *Mytilus* species  
290 around the world (14-16), has shown that these cancer cells also can survive for a few days in seawater  
291 (26). The authors assayed cell survival at 18°C; our results showing longer survival of MarBTN at lower  
292 temperatures suggest that their finding of 6-day survival may be an underestimate. It will be interesting to  
293 determine in the future whether our finding of the effects of salinity and temperature on survival are the  
294 same across BTNs from different species.

295 One limitation of our study is that detection of MarBTN-specific eDNA does not confirm that live cells  
296 are in the environment, only that the DNA can be detected. However, given the fact that BTN cells in  
297 different animals are identical to each other, and that BTN cells can survive well in the marine  
298 environment, it seems reasonable to conclude that eDNA is detecting live cells. This study provides the  
299 proof of principle for an eDNA assay that can be used to determine the timing of cell release during BTN  
300 progression. It can also be used to identify the presence of BTN in field samples, potentially serving as a  
301 non-invasive proxy for monitoring disease in the wild and possibly reducing the requirement for more  
302 invasive and expensive screening of animals for disease.

303 In this study, we show evidence supporting the long-term survival of MarBTN cells and release of  
304 MarBTN cells from diseased animals. Overall, these data provide proof of principle supporting the  
305 transmission of BTN through the seawater as a pathogen, and they establish new methods to investigate  
306 the mechanisms of BTN survival, progression, and spread.

307

## 308 **ACKNOWLEDGEMENTS**

309 We acknowledge the assistance of David Wilson for collection of seawater samples in Maine and Bret  
310 Pearson (University of Toronto) for suggesting the use of voriconazole.

311

312 **FUNDING INFORMATION**

313 This project was funded by support from the NIH (K22-CA226047 for MJM and T32-GM007270 and  
314 T32-HG000035 for SFMH) and NSF (grants #1849227 to SGR, 1701480 for JAFR and MJOR, and  
315 1950443 for SGR and MJOR).

316

317 **SUPPLEMENTARY MATERIALS**

318 Table S1. Collection information of soft-shell clams (*Mya arenaria*) used in this study

319 Table S2. Primers used in qPCR and cloning

320 Figure S1. Detection of MarBTN eDNA from seawater in aquaria with secondary qPCR marker

321

322 **CONFLICT OF INTEREST STATEMENT**

323 The authors declare no conflicts of interest.

324

325 **FIGURE LEGENDS**

326 **Figure 1. The effect of salinity, pH, and temperature on survival of MarBTN cells in artificial**

327 **seawater.** BTN cells from soft-shell clams were collected and incubated in ASW with varying (A)

328 salinity, (B) pH, and (C) temperature for four hours before survival was measured, using erythrosine B to

329 identify viable cells. Unless it was the variable being tested, ASW was prepared at average marine salinity

330 (1.023 sg), without additional pH modification (pH 7.93), and held at 16°C. For pH and temperature

331 experiments, live cell counts at 4 hrs were normalized by cell counts for each well at initiation of the

332 experiment, but due to acute toxicity of low salinity, this could not be done for part A. These counts were

333 normalized by the expected number of cells based on cell counting of the initial cell suspension, assuming

334 no loss during centrifugation and pipetting. For each experiment, 3-6 independent replicates using BTN  
335 cells from separate diseased clam donors were conducted (colored points), with the average shown (black  
336 points with line) and error bars showing the standard error of the mean. Identity of clam donors is listed in  
337 Table S1.

338 **Figure 2. The effect of temperature on long-term survival of MarBTN cells in artificial seawater.**

339 BTN cells were collected from three different diseased clams and incubated in ASW (1.023 sg, pH 7.93,  
340 with penicillin/streptomycin/voriconazole). For each clam, cells were incubated in 4°C, 10°C, 13°C, 16°C,  
341 25°C, and 37°C. Cell survival was monitored by resuspension and removal of an aliquot of cells, counted  
342 using erythrosine B, at 4 hrs, 1 day, 2 days, 3 days, 1 week, and weekly beyond that. Experiments were  
343 stopped when survival dropped below 10%.

344 **Figure 3. Detection of MarBTN eDNA from seawater in aquaria and from sites of known endemic**

345 **BTN.** Representative healthy and cancerous soft-shell clams were identified (**A**) through a screen of  
346 hemocyte morphology, and (**B**) the diagnosis was confirmed using a qPCR analysis of genomic DNA  
347 from hemocytes obtained from one of the diseased animal and the healthy animal used in the subsequent  
348 eDNA experiment. (**C**) The schematic shows the healthy *NIN2* allele and the cancer-associated allele,  
349 with arrows indicating the locations of the control primers (Total *NIN2*, black), used to determine the  
350 total number of clam alleles, and primers specific for the clam BTN lineage (Cancer *NIN2*, red), used to  
351 quantify BTN DNA. For eDNA analysis (**D-E**), each animal was housed in a separate aquarium, and  
352 eDNA was extracted from aquaria water on 3 sequential days. (**F**) Samples of water from sites in Maine  
353 with soft-shell clams known to have BTN were collected and eDNA was extracted. For each site, one  
354 water sample was collected and three sub-samples were extracted separately. qPCR analysis of the  
355 MarBTN-specific marker (Cancer-HL03) confirms detection of BTN DNA in the water. Copy numbers  
356 per  $\mu\text{L}$  DNA were converted to copies/mL, based on normalization to the total volume of water extracted.  
357 The dotted line shows 1 copy/reaction. For all qPCR, each sample was run in three reactions, and the  
358 values presented here are averages of the triplicate results. The average value was shown to be above zero

359 only if the product was detectable in all triplicate reactions. Water was used as the no template control  
360 (NTC) and was undetectable in all three wells.

361

## 362 REFERENCES

- 363 1. Murgia C, Pritchard JK, Kim SY, Fassati A, Weiss RA. Clonal origin and evolution of a  
364 transmissible cancer. *Cell*. 2006;126(3):477-87. PubMed PMID: 16901782; PMCID: 2593932.
- 365 2. Rebbeck CA, Thomas R, Breen M, Leroi AM, Burt A. Origins and evolution of a transmissible  
366 cancer. *Evolution*. 2009;63(9):2340-9. PubMed PMID: 19453727.
- 367 3. Pearse AM, Swift K. Allograft theory: transmission of devil facial-tumour disease. *Nature*.  
368 2006;439(7076):549. PubMed PMID: 16452970.
- 369 4. Murchison EP, Schulz-Trieglaff OB, Ning Z, Alexandrov LB, Bauer MJ, Fu B, Hims M, Ding Z,  
370 Ivakhno S, Stewart C, Ng BL, Wong W, Aken B, White S, Alsop A, Becq J, Bignell GR,  
371 Cheetham RK, Cheng W, Connor TR, Cox AJ, Feng ZP, Gu Y, Grocock RJ, Harris SR,  
372 Khrebtukova I, Kingsbury Z, Kowarsky M, Kreiss A, Luo S, Marshall J, McBride DJ, Murray L,  
373 Pearse AM, Raine K, Rasolonjatovo I, Shaw R, Tedder P, Tregidgo C, Vilella AJ, Wedge DC,  
374 Woods GM, Gormley N, Humphray S, Schroth G, Smith G, Hall K, Searle SM, Carter NP,  
375 Papenfuss AT, Futreal PA, Campbell PJ, Yang F, Bentley DR, Evers DJ, Stratton MR. Genome  
376 sequencing and analysis of the Tasmanian devil and its transmissible cancer. *Cell*.  
377 2012;148(4):780-91. PubMed PMID: 22341448; PMCID: 3281993.
- 378 5. Metzger MJ, Reinisch C, Sherry J, Goff SP. Horizontal transmission of clonal cancer cells causes  
379 leukemia in soft-shell clams. *Cell*. 2015;161(2):255-63. PubMed PMID: 25860608; PMCID:  
380 PMC4393529.
- 381 6. Barber BJ. Neoplastic diseases of commercially important marine bivalves. *Aquatic Living*  
382 *Resources*. 2004;17(4):449-66.



- 383 7. Carballal MJ, Barber BJ, Iglesias D, Villalba A. Neoplastic diseases of marine bivalves. J  
384 Invertebr Pathol. 2015;131:83-106. PubMed PMID: 26146225.
- 385 8. AboElkhair M, Synard S, Siah A, Pariseau J, Davidson J, Johnson G, Greenwood SJ, Casey JW,  
386 Berthe FC, Cepica A. Reverse transcriptase activity in tissues of the soft shell clam *Mya arenaria*  
387 affected with haemic neoplasia. J Invertebr Pathol. 2009;102(2):133-40. PubMed PMID:  
388 19632237.
- 389 9. Oprandy JJ, Chang PW, Pronovost AD, Cooper KR, Brown RS, Yates VJ. Isolation of a viral  
390 agent causing hematopoietic neoplasia in the soft-shell clam, *Mya arenaria*. Journal of  
391 Invertebrate Pathology. 1981;38(1):45-51.
- 392 10. Sunila I, Farley CA. Environmental limits for survival of sarcoma-cells from the soft-shell clam  
393 *Mya arenaria*. Diseases of Aquatic Organisms. 1989;7(2):111-5. PubMed PMID:  
394 WOS:A1989AY90800005.
- 395 11. Moore JD. Pathogenesis of disseminated neoplasia in eastern Pacific *Mytilus trossulus*:  
396 University of Washington; 1993.
- 397 12. Metzger MJ, Villalba A, Carballal MJ, Iglesias D, Sherry J, Reinisch C, Muttray AF, Baldwin  
398 SA, Goff SP. Widespread transmission of independent cancer lineages within multiple bivalve  
399 species. Nature. 2016;534(7609):705-9. PubMed PMID: 27338791; PMCID: PMC4939143.
- 400 13. Metzger MJ, Goff SP. A Sixth Modality of Infectious Disease: Contagious Cancer from Devils to  
401 Clams and Beyond. PLoS Pathog. 2016;12(10):e1005904. PubMed PMID: 27788268; PMCID:  
402 PMC5082865.
- 403 14. Yonemitsu MA, Giersch RM, Polo-Prieto M, Hammel M, Simon A, Cremonte F, Aviles FT,  
404 Merino-Veliz N, Burioli EA, Muttray AF, Sherry J, Reinisch C, Baldwin SA, Goff SP, Houssin  
405 M, Arriagada G, Vazquez N, Bierne N, Metzger MJ. A single clonal lineage of transmissible  
406 cancer identified in two marine mussel species in South America and Europe. Elife. 2019;8.  
407 PubMed PMID: 31686650; PMCID: PMC6831032.

- 408 15. Skazina M, Odintsova N, Maiorova M, Ivanova A, Vainola R, Strelkov P. First description of a  
409 widespread *Mytilus trossulus*-derived bivalve transmissible cancer lineage in *M. trossulus* itself.  
410 Sci Rep. 2021;11(1):5809. PubMed PMID: 33707525; PMCID: PMC7970980.
- 411 16. Hammel M, Simon A, Arbiol C, Villalba A, Burioli EAV, Pepin JF, Lamy JB, Benabdelmouna  
412 A, Bernard I, Houssin M, Charriere GM, Destoumieux-Garzon D, Welch JJ, Metzger MJ, Bierne  
413 N. Prevalence and polymorphism of a mussel transmissible cancer in Europe. Mol Ecol. 2021.  
414 PubMed PMID: 34192383.
- 415 17. Garcia-Souto D, Bruzos AL, Diaz S, Rocha S, Pequeño A, Roman-Lewis CF, Alonso J,  
416 Rodriguez R, Costas D, Rodriguez-Castro J, Villanueva A, Silva J, Valencia JM, Annona G,  
417 Tarallo A, Ricardo F, Cetinic AB, Posada D, Pasantes JJ, Tubio JMC. Mitochondrial genome  
418 sequencing of marine leukemias reveals cancer contagion between clam species in the Seas of  
419 Southern Europe. biorXiv. 2021;<https://doi.org/10.1101/2021.03.10.434714>
- 420 18. Brown RS, Wolke RE, Saila SB, Brown CW. Prevalence of neoplasia in 10 New England  
421 populations of the soft-shell clam (*Mya arenaria*). Ann N Y Acad Sci. 1978;298:522-34. PubMed  
422 PMID: 280191.
- 423 19. Yevich PP, Barszcz CA. Neoplasia in soft-shell clams (*Mya arenaria*) collected from oil-  
424 impacted sites. Ann N Y Acad Sci. 1978;298:409-26. PubMed PMID: 280190.
- 425 20. Farley CA, Plutschak DL, Scott RF. Epizootiology and distribution of transmissible sarcoma in  
426 Maryland softshell clams, *Mya arenaria*, 1984-1988. Environ Health Perspect. 1991;90:35-41.  
427 PubMed PMID: 2050081; PMCID: 1519504.
- 428 21. Sunila I. Serum-cell interactions in transmission of sarcoma in the soft shell clam, *Mya arenaria*  
429 L. Comp Biochem Physiol Comp Physiol. 1992;102(4):727-30. PubMed PMID: 1355037.
- 430 22. Renshaw MA, Olds BP, Jerde CL, McVeigh MM, Lodge DM. The room temperature  
431 preservation of filtered environmental DNA samples and assimilation into a phenol-chloroform-  
432 isoamyl alcohol DNA extraction. Mol Ecol Resour. 2015;15(1):168-76. PubMed PMID:  
433 24834966; PMCID: PMC4312482.

- 434 23. Arriagada G, Metzger MJ, Muttray AF, Sherry J, Reinisch C, Street C, Lipkin WI, Goff SP.  
435 Activation of transcription and retrotransposition of a novel retroelement, *Steamer*, in neoplastic  
436 hemocytes of the mollusk *Mya arenaria*. Proc Natl Acad Sci U S A. 2014;111(39):14175-80.  
437 PubMed PMID: 25201971; PMCID: PMC4191779.
- 438 24. Weinberg JR, Leavitt DF, Lancaster BA, Capuzzo JM. Experimental field studies with *Mya*  
439 *arenaria* (*Bivalvia*) on the induction and effect of hematopoietic neoplasia. J Invertebr Pathol.  
440 1997;69(2):183-94. PubMed PMID: 9056469.
- 441 25. Leavitt DF, McDowell Capuzzo J, Smolowitz RM, Miosky DL, Lancaster BA, Reinisch CL.  
442 Hematopoietic neoplasia in *Mya arenaria*: Prevalence and indices of physiological condition.  
443 Mar Biol. 1990;105(2):313-21.
- 444 26. Burioli EAV, Hammel M, Bierne N, Thomas F, Houssin M, Destoumieux-Garzon D, Charriere  
445 GM. Traits of a mussel transmissible cancer are reminiscent of a parasitic life style. Sci Rep.  
446 2021;11(1):24110. PubMed PMID: 34916573; PMCID: PMC8677744.
- 447

Figure 1. The effect of salinity, pH, and temperature on survival of MarBTN cells in artificial seawater.

A

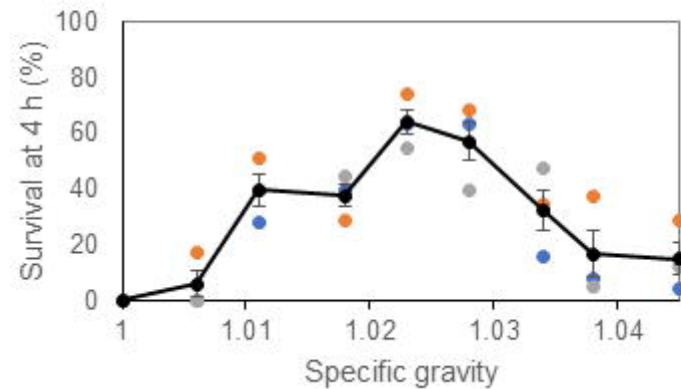

B

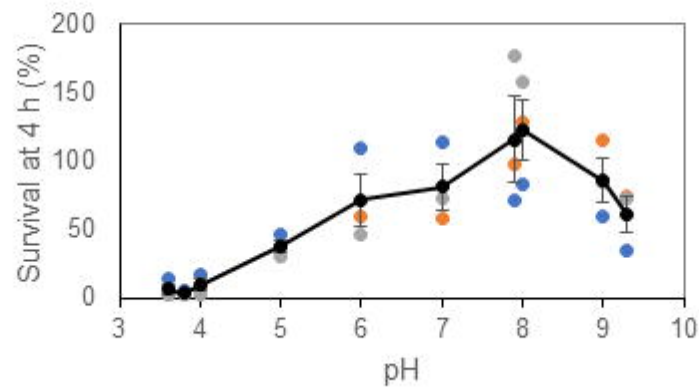

C

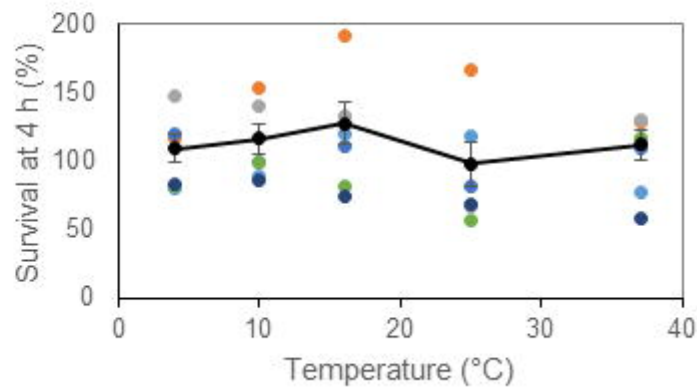

Figure 2. The effect of temperature on long-term survival of MarBTN cells in artificial seawater.

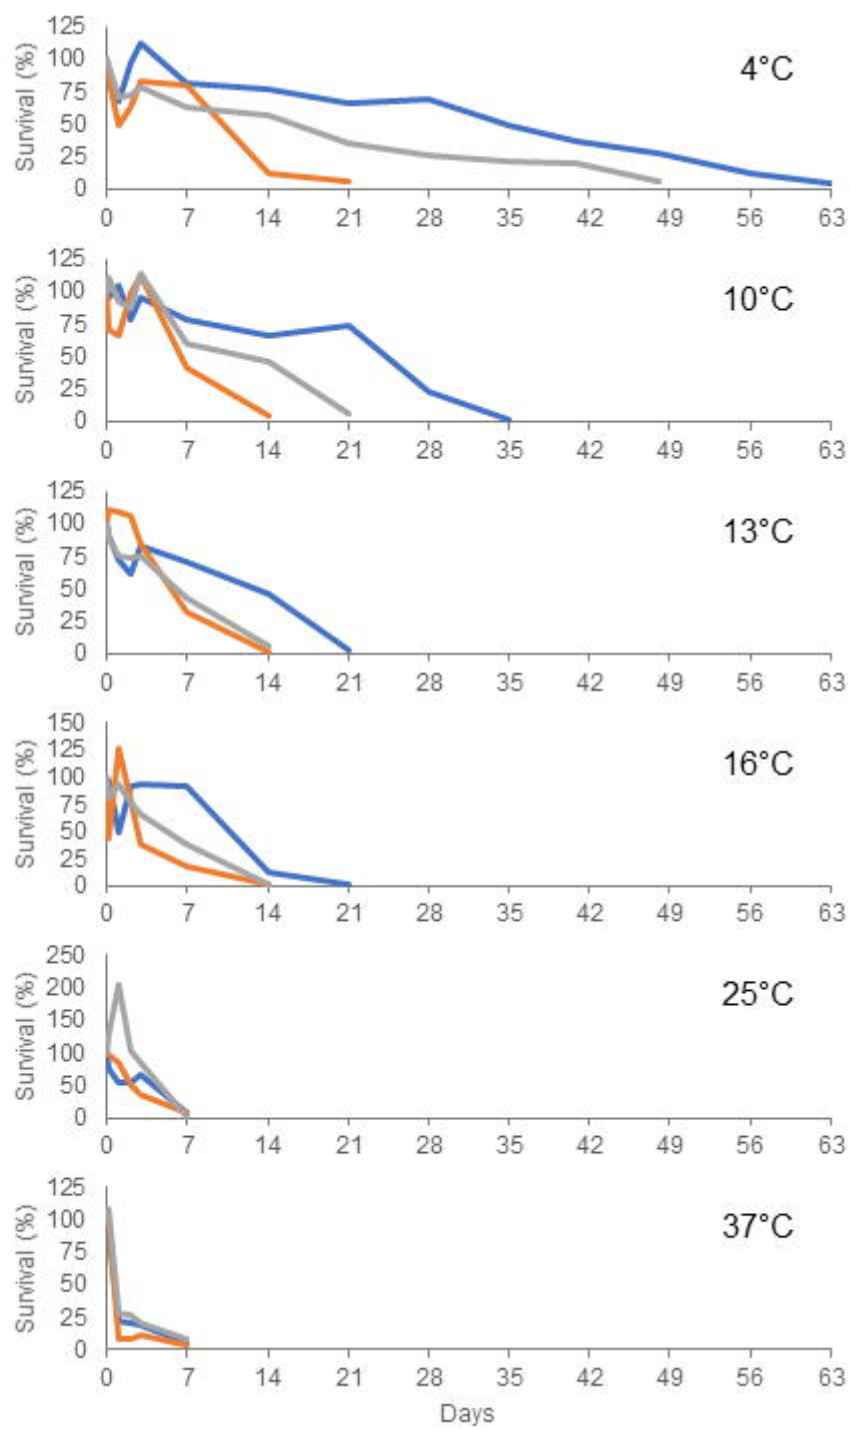

Figure 3. Detection of MarBTN eDNA from seawater in aquaria and from sites of known endemic BTN.

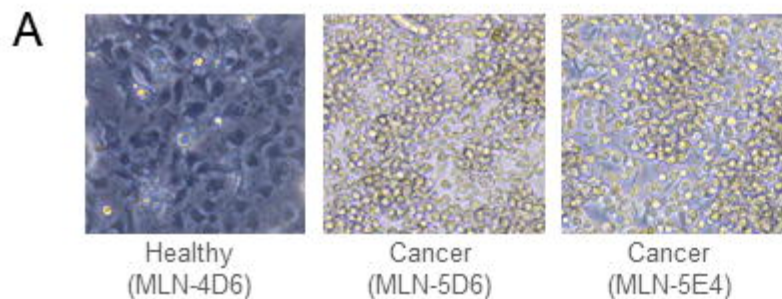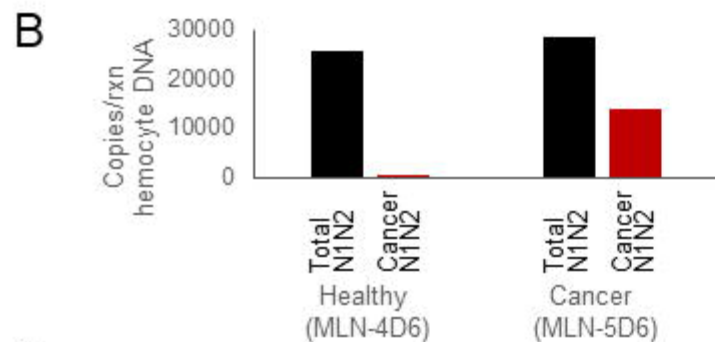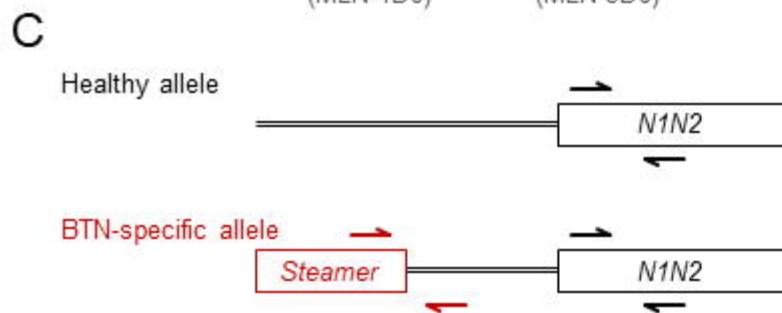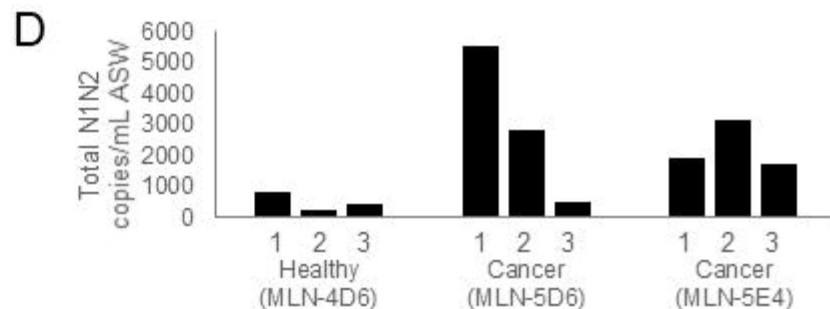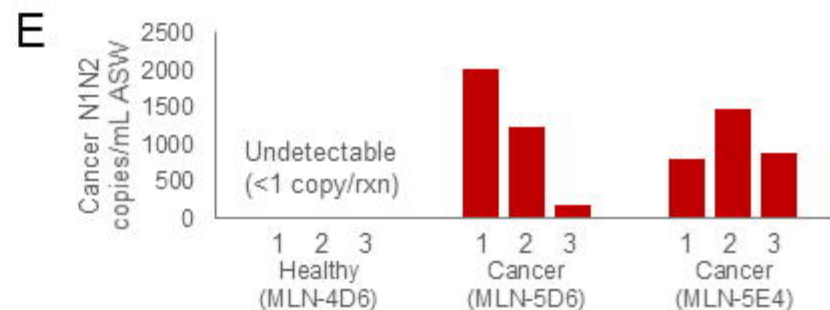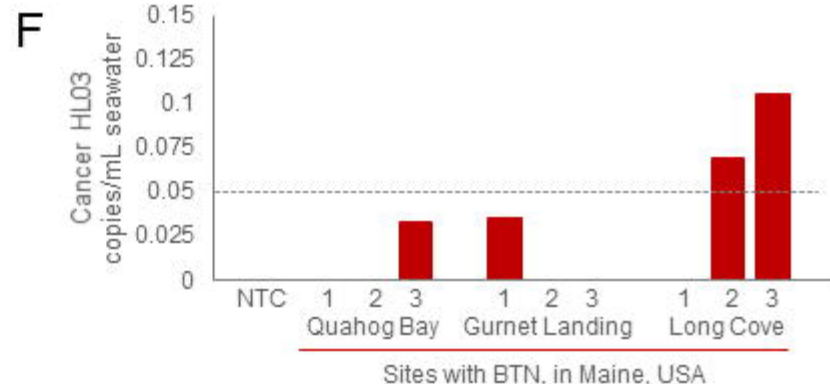

Source: https://www.biorxiv.org/content/10.1101/2021.12.25.473725v1.full.pdf
